# Supplementary material for: Distinct inflammatory profile underlies pathological increases in creatinine levels associated with Plasmodium vivax malaria clinical severity
Source: PubMed Central journal article supplement (PMC5875744; doi:10.1371/journal.pntd.0006306), 2018-03-29
Supplement: pntd.0006306.s002.pdf [file pntd.0006306.s002.pdf]

**S2 Table: Clinical characteristics of vivax malaria patients**

| <b>Characteristic – no. (%)</b>    | <b>Elevated Creatinine Levels</b> | <b>Normal Creatinine Levels</b> | <b>P-value</b> |
|------------------------------------|-----------------------------------|---------------------------------|----------------|
| <b>N</b>                           | 89                                | 90                              |                |
| <b>Fever</b>                       | 89 (100)                          | 90 (100)                        | 1.0000         |
| <b>Sweating<sup>a</sup></b>        | 53 (60.23*)                       | 32 (35.55)                      | 0.0242         |
| <b>Tachycardia</b>                 | 24 (26.97)                        | 17 (18.88)                      | 0.2171         |
| <b>Tachypnea</b>                   | 9 (10.11)                         | 6 (6.66)                        | 0.4330         |
| <b>Vomiting</b>                    | 13 (14.61)                        | 9 (9.99)                        | 0.3722         |
| <b>Oliguria</b>                    | 12 (13.48)                        | 1 (1.11)                        | <0.0001        |
| <b>Diarrhea<sup>a</sup></b>        | 17 (19.10)                        | 5 (5.55)                        | 0.0063         |
| <b>Dehydration<sup>a</sup></b>     | 21 (23.59)                        | 9 (9.99)                        | 0.0168         |
| <b>Abdominal Pain<sup>a</sup></b>  | 10 (11.24)                        | 2 (2.22)                        | 0.0180         |
| <b>Hepatomegaly<sup>a</sup></b>    | 17 (19.10)                        | 6 (6.66)                        | 0.0145         |
| <b>Jaundice<sup>a</sup></b>        | 22 (24.72)                        | 9 (9.99)                        | 0.0047         |
| <b>Choluria</b>                    | 7 (7.86)                          | 1 (1.11)                        | 0.0344         |
| <b>Pale or clay-colored stools</b> | 4 (4.60**)                        | 0 (0)                           | 0.0563         |
| <b>Headache</b>                    | 53 (59.55)                        | 47 (52.22)                      | 0.3675         |
| <b>Disorientation<sup>a</sup></b>  | 19 (21.35)                        | 3 (3.37 <sup>#</sup> )          | 0.0004         |
| <b>Seizures</b>                    | 8 (8.99)                          | 2 (2.22)                        | 0.0574         |

Data were compared using the exact Fisher's test. Subjects were classified as having elevated creatinine levels if serum creatinine values were above 1.24mg/dL for women, and 1.29mg/dL for men. Oliguria was defined as estimated urinary output less than 400mL/24 h.

<sup>a</sup> = Differences were significant between the groups.

\* Data from only 88 patients were available.

\*\* Data from only 87 patients were available.

<sup>#</sup> Data from only 89 patients were available.
