# Supplementary material for: Distinct inflammatory profile underlies pathological increases in creatinine levels associated with Plasmodium vivax malaria clinical severity
Source: PubMed Central journal article supplement (PMC5875744; doi:10.1371/journal.pntd.0006306), 2018-03-29
Supplement: pntd.0006306.s003.pdf [file pntd.0006306.s003.pdf]

**S3 Table. Biochemical Evaluation of Healthy Controls and Patients with Elevated and Normal Creatinine Levels.**

| <b>Variables</b>                          | <b>Healthy Controls</b> | <b>Elevated Creatinine Levels</b> | <b>Normal Creatinine Levels</b> | <b>P-value</b> |
|-------------------------------------------|-------------------------|-----------------------------------|---------------------------------|----------------|
| <b>N</b>                                  | 165                     | 89                                | 90                              |                |
| <b>TNF-<math>\alpha</math></b> – pg/mL    | 0 (0-9.2)               | 39.40 (20.75-83.80)               | 33.55 (12.55-78.85)             | <0.0001        |
| <b>IFN-<math>\gamma</math></b> – pg/mL    | 32.0 (11.2-62.15)       | 132.00 (35.00-333.50)             | 85.48 (40.15-321.5)             | <0.0001        |
| <b>IL-1<math>\beta</math></b> – pg/mL     | 5.95 (3.75-17.5)        | 11.40 (5.925-29.40)               | 10.09 (5.575-21.80)             | <0.0001        |
| <b>IL-4</b> – pg/mL                       | 25.31 (13.49-40.31)     | 28.47 (18.37-113.30)              | 31.25 (16.16-97.15)             | 0.0188         |
| <b>IL-6</b> – pg/mL                       | 8.3 (5.2-20.2)          | 69.20 (22.15-140.40)              | 59.10 (29.13-104.10)            | <0.0001        |
| <b>IL-8</b> – pg/mL                       | 6.03 (4.765-9.9)        | 32.50 (6.14-190.0)                | 20.54 (5.183-69.63)             | <0.0001        |
| <b>IL-10</b> – pg/mL                      | 12.0 (7.0-20.4)         | 9.69 (6.43-36.83)                 | 19.70 (6.50-59.54)              | 0.0469         |
| <b>IFN-<math>\gamma</math>/IL-10</b> – AU | 2.664 (0.706-5.306)     | 5.720 (1.675-25.21)               | 3.334 (1.181-6.558)             | 0.0001         |
| <b>IL-12p70</b> – pg/mL                   | 7.34 (4.865-15.05)      | 20.94 (10.20-33.35)               | 20.45 (15.73-30.30)             | <0.0001        |
| <b>CRP</b> – ng/mL                        | 4.8 (3.7-6.7)           | 21.30 (9.45-38.45)                | 11.20 (7.125-29.58)             | <0.0001        |
| <b>CCL2 (MCP-1)</b> – ng/mL               | 101.2 (41.19-182.0)     | 73.10 (21.21-161.4)               | 61.24 (22.99-143.6)             | 0.0094         |
| <b>CCL5 (RANTES)</b> – $\mu$ g/mL         | 30315 (16429-46584)     | 25739 (18530-79892)               | 24982 (14214-50209)             | 0.3357         |
| <b>CXCL9 (MIG)</b> – ng/mL                | 326.8 (181.4-488.6)     | 2386 (507-11548)                  | 2120 (368.1-6854)               | <0.0001        |
| <b>CXCL10</b> – pg/mL                     | 101.4 (35.36-211.1)     | 71.30 (26.07-445.8)               | 77.55 (25.17-273.9)             | 0.6468         |
| <b>Fibrinogen</b> – mg/dL                 | 215.4 (193.2-295.3)     | 400.2 (274.2-497.5)               | 309.5 (218.1-478.1)             | <0.0001        |
| <b>AST</b> –U/L                           | 42.1 (33.6-54.3)        | 167.4 (87.62-642.8)               | 166.3 (68.97-428.4)             | <0.0001        |
| <b>ALT</b> –U/L                           | 38.9 (33.2-45.75)       | 190.3 (133.7-495.2)               | 177.6 (112.6-352.2)             | <0.0001        |
| <b>Total Bilirubin</b> – mg/dL            | 0.700 (0.485-1.000)     | 1.300 (0.965-2.100)               | 0.910 (0.687-1.725)             | <0.0001        |
| <b>Direct Bilirubin</b> – mg/dL           | 0.260 (0.150-0.395)     | 0.500 (0.300-0.900)               | 0.400 (0.200-0.700)             | <0.0001        |
| <b>Indirect Bilirubin</b> – mg/dL         | 0.400 (0.280-0.610)     | 0.800 (0.530-1.300)               | 0.625 (0.400-1.125)             | <0.0001        |
