# Supplementary material for: Distinct inflammatory profile underlies pathological increases in creatinine levels associated with Plasmodium vivax malaria clinical severity
Source: PLOS journal article supplement (doi:10.1371/journal.pntd.0006306), 2018-03-29
Supplement: S1 (10.1371/journal.pntd.0006306.s001) [file journal.pntd.0006306.s001]

**S1 Table: Characteristics of the study participants**

| Variables                                                  | Endemic Controls | <i>P. vivax</i> malaria  |                      |
|------------------------------------------------------------|------------------|--------------------------|----------------------|
|                                                            |                  | non-severe vivax malaria | severe vivax malaria |
| <b>N</b>                                                   | 165*             | 161                      | 18                   |
| <b>Women– no. (%)</b>                                      | 80 (52.63)       | 72 (44.72)               | 7 (38.89)            |
| <b>Age– yrs. <sup>a</sup></b>                              |                  |                          |                      |
| Median                                                     | 39               | 33                       | 19.5                 |
| Interquartile interval                                     | 25-51            | 27-47                    | 14.25-57.5           |
| <b>**Previous malaria episodes <sup>a,b</sup></b>          |                  |                          |                      |
| Median                                                     | 13               | 6                        | 1                    |
| Interquartile interval                                     | 10-18            | 1-12.75                  | 0-5.25               |
| <b>Years resident in the area – no. (%) <sup>a,b</sup></b> |                  |                          |                      |
| <2yrs.                                                     | 39 (25.66)       | 44 (27.33)               | 8 (44.45)            |
| 3-10yrs.                                                   | 16 (10.52)       | 38 (23.60)               | 8 (44.45)            |
| >10yrs.                                                    | 97 (63.82)       | 79 (49.07)               | 2 (11.10)            |
| <b>Parasitemia (count/μL)</b>                              |                  |                          |                      |
| Median                                                     | 0                | 6523                     | 3403                 |
| Interquartile interval                                     | 0                | 1140-72532               | 1001-7560            |
| <b>Serum creatinine (mg/dL) <sup>a,b</sup></b>             |                  |                          |                      |
| Median                                                     | 1.23             | 1.25                     | 1.6                  |
| Interquartile interval                                     | 1.09-1.3         | 1.16-1.35                | 1.28-2.35            |
| <b>CRP (ng/dL) <sup>a</sup></b>                            |                  |                          |                      |
| Median                                                     | 4.8              | 15.5                     | 16.2                 |
| Interquartile interval                                     | 3.7-6.7          | 8.15-32.65               | 8.53-45.25           |
| <b>AST (U/L) <sup>a</sup></b>                              |                  |                          |                      |
| Median                                                     | 42.1             | 165.6                    | 180.9                |
| Interquartile interval                                     | 33.6-54.3        | 85.5-642.8               | 58.65-259.2          |
| <b>ALT (U/L) <sup>a</sup></b>                              |                  |                          |                      |
| Median                                                     | 38.9             | 177.1                    | 199.5                |
| Interquartile interval                                     | 33.2-45.75       | 123.7-495.2              | 116.4-293.2          |
| <b>Total Bilirubin (mg/dL) <sup>a,b</sup></b>              |                  |                          |                      |
| Median                                                     | 0.7              | 1.15                     | 1.85                 |
| Interquartile interval                                     | 0.49-1.0         | 0.77-1.8                 | 1.5-2.53             |
| <b>Direct Bilirubin (mg/dL) <sup>a</sup></b>               |                  |                          |                      |
| Median                                                     | 0.26             | 0.4                      | 0.55                 |
| Interquartile interval                                     | 0.15-0.40        | 0.3-0.78                 | 0.3-1.08             |
| <b>Indirect Bilirubin (mg/dL) <sup>a,b</sup></b>           |                  |                          |                      |
| Median                                                     | 0.4              | 0.68                     | 1.25                 |
| Interquartile interval                                     | 0.28-0.62        | 0.44-1.15                | 1.0-1.75             |

Frequency data were compared using the exact Fisher's test or the chi-square test. Continuous variables were compared using the Kruskal-Wallis test or the Mann-Whitney U test.

CRP, C-reactive protein; ALT, alanine aminotransferase; AST, aspartate aminotransferase.

\*From 165 subjects recruited as endemic controls, only 152 had all the epidemiological data available.

\*\* From 161 subjects with non-severe vivax malaria for the variable, 160 could recall this information.

<sup>a</sup> = Differences were significant between the three groups.

<sup>b</sup> = Differences were significant between the two groups of vivax malaria patients.
